# Supplementary material for: Tissue and serum samples of patients with papillary thyroid cancer with and without benign background demonstrate different altered expression of proteins
Source: PeerJ. 2016 Sep 13;4:e2450. doi: 10.7717/peerj.2450 (PMC5028788; doi:10.7717/peerj.2450)
Supplement: Supplemental Information 1 — (A) Shows the anova value given by the ImageMaster 2D Platium v 7.0 software and details of the percentage of volume contribution of A1ATb; (B) Shows the anova value given by the ImageMaster 2D Platium v 7.0 software and details of the percentage of volume contribution of HSP70; (C) Shows the anova value given by the ImageMaster 2D Platium v 7.0 software and details of the percentage of volume contribution of A1ATb; (D) Shows the anova value given by the ImageMaster 2D Platium v 7.0 software and details of the percentage of volume contribution of A1ATc; (E) Shows the anova value given by the ImageMaster 2D Platium v 7.0 software and details of the percentage of volume contribution of A1ATd; (F) Shows the anova value given by the ImageMaster 2D Platium v 7.0 software and details of the percentage of volume contribution of PDI; (G) Shows the anova value given by the ImageMaster 2D Platium v 7.0 software and details of the percentage of volume contribution of UBE2N. [file peerj-04-2450-s001.xlsx]

## Sheet: Sheet1
Title:
Percentage volume contribution of 2DE tissue proteins that were differentially expressed in patients with BTG, PTCa and PTCb.
Legend:
A) Shows the anova value given by the ImageMaster 2D Platium v 7.0 software and details of the percentage of volume contribution of A1ATb
B) Shows the anova value given by the ImageMaster 2D Platium v 7.0 software and details of the percentage of volume contribution of HSP70
C) Shows the anova value given by the ImageMaster 2D Platium v 7.0 software and details of the percentage of volume contribution of A1ATb
D) Shows the anova value given by the ImageMaster 2D Platium v 7.0 software and details of the percentage of volume contribution of A1ATc
E) Shows the anova value given by the ImageMaster 2D Platium v 7.0 software and details of the percentage of volume contribution of A1ATd
F) Shows the anova value given by the ImageMaster 2D Platium v 7.0 software and details of the percentage of volume contribution of PDI
G) Shows the anova value given by the ImageMaster 2D Platium v 7.0 software and details of the percentage of volume contribution of UBE2N
A.A1ATb	Match Count	PTCa*	BTG*	Anova*		*Value given by the ImageMaster 2D Platinum V 7.0 software
	2	0.695216	0.477729	0.01
FileName
FileName	SpotID	%Vol
C:\Users\M\Documents\ImageMaster\Projects\Tutorials\Tutorial\MatchSet\PTC1.gda	2709	0.489408
C:\Users\M\Documents\ImageMaster\Projects\Tutorials\Tutorial\MatchSet\PTC2.gda	3197	0.582422
C:\Users\M\Documents\ImageMaster\Projects\Tutorials\Tutorial\MatchSet\PTC3.gda	3648	0.722673
C:\Users\M\Documents\ImageMaster\Projects\Tutorials\Tutorial\MatchSet\PTC4.gda	2266	0.531994
C:\Users\M\Documents\ImageMaster\Projects\Tutorials\Tutorial\MatchSet\PTC5.gda	2785	0.69882
C:\Users\M\Documents\ImageMaster\Projects\Tutorials\Tutorial\MatchSet\PTC6.gda	2445	0.885315
C:\Users\M\Documents\ImageMaster\Projects\Tutorials\Tutorial\MatchSet\PTC7.gda	3507	0.955876
C:\Users\M\Documents\ImageMaster\Projects\Tutorials\Tutorial\MatchSet\BTG1.gda	3280	0.324585
C:\Users\M\Documents\ImageMaster\Projects\Tutorials\Tutorial\MatchSet\BTG2.gda	2978	0.784322
C:\Users\M\Documents\ImageMaster\Projects\Tutorials\Tutorial\MatchSet\BTG3.gda	2771	0.382264
C:\Users\M\Documents\ImageMaster\Projects\Tutorials\Tutorial\MatchSet\BTG4.gda	2656	0.367726
C:\Users\M\Documents\ImageMaster\Projects\Tutorials\Tutorial\MatchSet\BTG5.gda	2826	0.33013
C:\Users\M\Documents\ImageMaster\Projects\Tutorials\Tutorial\MatchSet\BTG6.gda	2483	0.476322
C:\Users\M\Documents\ImageMaster\Projects\Tutorials\Tutorial\MatchSet\BTG7.gda	3346	0.223255
C:\Users\M\Documents\ImageMaster\Projects\Tutorials\Tutorial\MatchSet\BTG8.gda	2832	0.710106
C:\Users\M\Documents\ImageMaster\Projects\Tutorials\Tutorial\MatchSet\BTG9.gda	3620	0.498497
C:\Users\M\Documents\ImageMaster\Projects\Tutorials\Tutorial\MatchSet\BTG10.gda	2384	0.28551
C:\Users\M\Documents\ImageMaster\Projects\Tutorials\Tutorial\MatchSet\BTG11.gda	3665	0.574819
C:\Users\M\Documents\ImageMaster\Projects\Tutorials\Tutorial\MatchSet\BTG12.gda	2390	0.581884
C:\Users\M\Documents\ImageMaster\Projects\Tutorials\Tutorial\MatchSet\BTG13.gda	2908	0.722937
C:\Users\M\Documents\ImageMaster\Projects\Tutorials\Tutorial\MatchSet\BTG14.gda	3215	0.51569
C:\Users\M\Documents\ImageMaster\Projects\Tutorials\Tutorial\MatchSet\BTG15.gda	2620	0.388496
C:\Users\M\Documents\ImageMaster\Projects\Tutorials\Tutorial\MatchSet\BTG16.gda	3476	0.798854
C:\Users\M\Documents\ImageMaster\Projects\Tutorials\Tutorial\MatchSet\BTG17.gda	3016	0.3885
C:\Users\M\Documents\ImageMaster\Projects\Tutorials\Tutorial\MatchSet\BTG18.gda	2719	0.680803
C:\Users\M\Documents\ImageMaster\Projects\Tutorials\Tutorial\MatchSet\BTG19.gda	2381	0.172596
C:\Users\M\Documents\ImageMaster\Projects\Tutorials\Tutorial\MatchSet\BTG20.gda	2972	0.347278
B.HSP70	Match Count	PTCa*	BTG*	Anova*		*Value given by the ImageMaster 2D Platinum V 7.0 software
	2	1.16572	0.509349	0.003
FileName
FileName	SpotID	%Vol
C:\Users\M\Documents\ImageMaster\Projects\Tutorials\Tutorial\MatchSet\PTC1.gda	2546	1.05679
C:\Users\M\Documents\ImageMaster\Projects\Tutorials\Tutorial\MatchSet\PTC2.gda	2986	0.949693
C:\Users\M\Documents\ImageMaster\Projects\Tutorials\Tutorial\MatchSet\PTC3.gda	3495	0.562084
C:\Users\M\Documents\ImageMaster\Projects\Tutorials\Tutorial\MatchSet\PTC4.gda	2121	2.56366
C:\Users\M\Documents\ImageMaster\Projects\Tutorials\Tutorial\MatchSet\PTC5.gda	2592	1.50912
C:\Users\M\Documents\ImageMaster\Projects\Tutorials\Tutorial\MatchSet\PTC6.gda	2254	1.24732
C:\Users\M\Documents\ImageMaster\Projects\Tutorials\Tutorial\MatchSet\PTC7.gda	3323	0.271369
C:\Users\M\Documents\ImageMaster\Projects\Tutorials\Tutorial\MatchSet\BTG1.gda	3186	0.692741
C:\Users\M\Documents\ImageMaster\Projects\Tutorials\Tutorial\MatchSet\BTG2.gda	2821	0.574717
C:\Users\M\Documents\ImageMaster\Projects\Tutorials\Tutorial\MatchSet\BTG3.gda	2631	0.386419
C:\Users\M\Documents\ImageMaster\Projects\Tutorials\Tutorial\MatchSet\BTG4.gda	3475	0.407221
C:\Users\M\Documents\ImageMaster\Projects\Tutorials\Tutorial\MatchSet\BTG5.gda	3752	0.298532
C:\Users\M\Documents\ImageMaster\Projects\Tutorials\Tutorial\MatchSet\BTG6.gda	2343	0.386707
C:\Users\M\Documents\ImageMaster\Projects\Tutorials\Tutorial\MatchSet\BTG7.gda	3146	0.344207
C:\Users\M\Documents\ImageMaster\Projects\Tutorials\Tutorial\MatchSet\BTG8.gda	2696	0.708495
C:\Users\M\Documents\ImageMaster\Projects\Tutorials\Tutorial\MatchSet\BTG9.gda	3460	0.8773
C:\Users\M\Documents\ImageMaster\Projects\Tutorials\Tutorial\MatchSet\BTG10.gda	2266	0.526635
C:\Users\M\Documents\ImageMaster\Projects\Tutorials\Tutorial\MatchSet\BTG11.gda	3462	0.484948
C:\Users\M\Documents\ImageMaster\Projects\Tutorials\Tutorial\MatchSet\BTG12.gda	2206	0.343684
C:\Users\M\Documents\ImageMaster\Projects\Tutorials\Tutorial\MatchSet\BTG13.gda	2685	1.20227
C:\Users\M\Documents\ImageMaster\Projects\Tutorials\Tutorial\MatchSet\BTG14.gda	3078	0.388558
C:\Users\M\Documents\ImageMaster\Projects\Tutorials\Tutorial\MatchSet\BTG15.gda	3439	0.171212
C:\Users\M\Documents\ImageMaster\Projects\Tutorials\Tutorial\MatchSet\BTG16.gda	3272	0.178707
C:\Users\M\Documents\ImageMaster\Projects\Tutorials\Tutorial\MatchSet\BTG17.gda	2751	0.192236
C:\Users\M\Documents\ImageMaster\Projects\Tutorials\Tutorial\MatchSet\BTG18.gda	2533	0.386455
C:\Users\M\Documents\ImageMaster\Projects\Tutorials\Tutorial\MatchSet\BTG19.gda	2183	0.302865
C:\Users\M\Documents\ImageMaster\Projects\Tutorials\Tutorial\MatchSet\BTG20.gda	2802	1.33308
C. A1ATb	Match Count	PTCb*	BTG*	Anova*		*Value given by the ImageMaster 2D Platinum V 7.0 software
	2	0.168144	0.477729	0.002
FileName	SpotID	%Vol
C:\Users\M\Documents\ImageMaster\Projects\Tutorials\Tutorial\MatchSet\PTC1.gda	3685	0.140273
C:\Users\M\Documents\ImageMaster\Projects\Tutorials\Tutorial\MatchSet\PTC2.gda	3119	0.084984
C:\Users\M\Documents\ImageMaster\Projects\Tutorials\Tutorial\MatchSet\PTC3.gda	2786	0.295934
C:\Users\M\Documents\ImageMaster\Projects\Tutorials\Tutorial\MatchSet\PTC4.gda	2429	0.146168
C:\Users\M\Documents\ImageMaster\Projects\Tutorials\Tutorial\MatchSet\PTC5.gda	7860	0.173361
C:\Users\M\Documents\ImageMaster\Projects\Tutorials\Tutorial\MatchSet\BTG1.gda	3280	0.324585
C:\Users\M\Documents\ImageMaster\Projects\Tutorials\Tutorial\MatchSet\BTG2.gda	2978	0.784322
C:\Users\M\Documents\ImageMaster\Projects\Tutorials\Tutorial\MatchSet\BTG3.gda	2771	0.382264
C:\Users\M\Documents\ImageMaster\Projects\Tutorials\Tutorial\MatchSet\BTG4.gda	2656	0.367726
C:\Users\M\Documents\ImageMaster\Projects\Tutorials\Tutorial\MatchSet\BTG5.gda	2826	0.33013
C:\Users\M\Documents\ImageMaster\Projects\Tutorials\Tutorial\MatchSet\BTG6.gda	2483	0.476322
C:\Users\M\Documents\ImageMaster\Projects\Tutorials\Tutorial\MatchSet\BTG7.gda	3346	0.223255
C:\Users\M\Documents\ImageMaster\Projects\Tutorials\Tutorial\MatchSet\BTG8.gda	2832	0.710106
C:\Users\M\Documents\ImageMaster\Projects\Tutorials\Tutorial\MatchSet\BTG9.gda	3620	0.498497
C:\Users\M\Documents\ImageMaster\Projects\Tutorials\Tutorial\MatchSet\BTG10.gda	2384	0.28551
C:\Users\M\Documents\ImageMaster\Projects\Tutorials\Tutorial\MatchSet\BTG11.gda	3665	0.574819
C:\Users\M\Documents\ImageMaster\Projects\Tutorials\Tutorial\MatchSet\BTG12.gda	2390	0.581884
C:\Users\M\Documents\ImageMaster\Projects\Tutorials\Tutorial\MatchSet\BTG13.gda	2908	0.722937
C:\Users\M\Documents\ImageMaster\Projects\Tutorials\Tutorial\MatchSet\BTG14.gda	3215	0.51569
C:\Users\M\Documents\ImageMaster\Projects\Tutorials\Tutorial\MatchSet\BTG15.gda	2620	0.388496
C:\Users\M\Documents\ImageMaster\Projects\Tutorials\Tutorial\MatchSet\BTG16.gda	3476	0.798854
C:\Users\M\Documents\ImageMaster\Projects\Tutorials\Tutorial\MatchSet\BTG17.gda	3016	0.3885
C:\Users\M\Documents\ImageMaster\Projects\Tutorials\Tutorial\MatchSet\BTG18.gda	2719	0.680803
C:\Users\M\Documents\ImageMaster\Projects\Tutorials\Tutorial\MatchSet\BTG19.gda	2381	0.172596
C:\Users\M\Documents\ImageMaster\Projects\Tutorials\Tutorial\MatchSet\BTG20.gda	2972	0.347278
D.A1ATc	Match Count	PTCb*	BTG*	Anova*		*Value given by the ImageMaster 2D Platinum V 7.0 software
	2	0.273337	0.660648	0.003
FileName	SpotID	%Vol
C:\Users\M\Documents\ImageMaster\Projects\Tutorials\Tutorial\MatchSet\PTC1.gda	3713	0.254477
C:\Users\M\Documents\ImageMaster\Projects\Tutorials\Tutorial\MatchSet\PTC2.gda	3134	0.227861
C:\Users\M\Documents\ImageMaster\Projects\Tutorials\Tutorial\MatchSet\PTC3.gda	2804	0.435848
C:\Users\M\Documents\ImageMaster\Projects\Tutorials\Tutorial\MatchSet\PTC4.gda	2436	0.268548
C:\Users\M\Documents\ImageMaster\Projects\Tutorials\Tutorial\MatchSet\PTC5.gda	7861	0.179952
C:\Users\M\Documents\ImageMaster\Projects\Tutorials\Tutorial\MatchSet\BTG1.gda	3296	0.498982
C:\Users\M\Documents\ImageMaster\Projects\Tutorials\Tutorial\MatchSet\BTG2.gda	2984	1.02755
C:\Users\M\Documents\ImageMaster\Projects\Tutorials\Tutorial\MatchSet\BTG3.gda	2780	0.620539
C:\Users\M\Documents\ImageMaster\Projects\Tutorials\Tutorial\MatchSet\BTG4.gda	2675	0.832383
C:\Users\M\Documents\ImageMaster\Projects\Tutorials\Tutorial\MatchSet\BTG5.gda	2860	0.587298
C:\Users\M\Documents\ImageMaster\Projects\Tutorials\Tutorial\MatchSet\BTG6.gda	2498	0.753586
C:\Users\M\Documents\ImageMaster\Projects\Tutorials\Tutorial\MatchSet\BTG7.gda	3353	0.547162
C:\Users\M\Documents\ImageMaster\Projects\Tutorials\Tutorial\MatchSet\BTG8.gda	2841	0.807325
C:\Users\M\Documents\ImageMaster\Projects\Tutorials\Tutorial\MatchSet\BTG9.gda	3637	0.798257
C:\Users\M\Documents\ImageMaster\Projects\Tutorials\Tutorial\MatchSet\BTG10.gda	2403	0.269656
C:\Users\M\Documents\ImageMaster\Projects\Tutorials\Tutorial\MatchSet\BTG11.gda	3687	0.513884
C:\Users\M\Documents\ImageMaster\Projects\Tutorials\Tutorial\MatchSet\BTG12.gda	2408	0.548181
C:\Users\M\Documents\ImageMaster\Projects\Tutorials\Tutorial\MatchSet\BTG13.gda	2878	1.13885
C:\Users\M\Documents\ImageMaster\Projects\Tutorials\Tutorial\MatchSet\BTG14.gda	3226	0.381952
C:\Users\M\Documents\ImageMaster\Projects\Tutorials\Tutorial\MatchSet\BTG15.gda	2625	0.457279
C:\Users\M\Documents\ImageMaster\Projects\Tutorials\Tutorial\MatchSet\BTG16.gda	3483	1.12919
C:\Users\M\Documents\ImageMaster\Projects\Tutorials\Tutorial\MatchSet\BTG17.gda	3038	0.596228
C:\Users\M\Documents\ImageMaster\Projects\Tutorials\Tutorial\MatchSet\BTG18.gda	2722	0.880874
C:\Users\M\Documents\ImageMaster\Projects\Tutorials\Tutorial\MatchSet\BTG19.gda	2388	0.295487
C:\Users\M\Documents\ImageMaster\Projects\Tutorials\Tutorial\MatchSet\BTG20.gda	2990	0.528297
E.A1ATd	Match Count	PTCb*	BTG*	Anova*		*Value given by the ImageMaster 2D Platinum V 7.0 software
	2	0.2832	0.637231	0.008
FileName	SpotID	%Vol
C:\Users\M\Documents\ImageMaster\Projects\Tutorials\Tutorial\MatchSet\PTC1.gda	3719	0.353625
C:\Users\M\Documents\ImageMaster\Projects\Tutorials\Tutorial\MatchSet\PTC2.gda	3149	0.225566
C:\Users\M\Documents\ImageMaster\Projects\Tutorials\Tutorial\MatchSet\PTC3.gda	2831	0.452079
C:\Users\M\Documents\ImageMaster\Projects\Tutorials\Tutorial\MatchSet\PTC4.gda	2452	0.285306
C:\Users\M\Documents\ImageMaster\Projects\Tutorials\Tutorial\MatchSet\PTC5.gda	7862	0.0994264
C:\Users\M\Documents\ImageMaster\Projects\Tutorials\Tutorial\MatchSet\BTG1.gda	3303	0.462648
C:\Users\M\Documents\ImageMaster\Projects\Tutorials\Tutorial\MatchSet\BTG2.gda	3009	0.780457
C:\Users\M\Documents\ImageMaster\Projects\Tutorials\Tutorial\MatchSet\BTG3.gda	2783	0.347874
C:\Users\M\Documents\ImageMaster\Projects\Tutorials\Tutorial\MatchSet\BTG4.gda	2690	1.06803
C:\Users\M\Documents\ImageMaster\Projects\Tutorials\Tutorial\MatchSet\BTG5.gda	2867	0.684894
C:\Users\M\Documents\ImageMaster\Projects\Tutorials\Tutorial\MatchSet\BTG6.gda	2511	0.673713
C:\Users\M\Documents\ImageMaster\Projects\Tutorials\Tutorial\MatchSet\BTG7.gda	3374	0.827738
C:\Users\M\Documents\ImageMaster\Projects\Tutorials\Tutorial\MatchSet\BTG8.gda	2852	0.740309
C:\Users\M\Documents\ImageMaster\Projects\Tutorials\Tutorial\MatchSet\BTG9.gda	3653	0.96833
C:\Users\M\Documents\ImageMaster\Projects\Tutorials\Tutorial\MatchSet\BTG10.gda	2406	0.242096
C:\Users\M\Documents\ImageMaster\Projects\Tutorials\Tutorial\MatchSet\BTG11.gda	3698	0.597212
C:\Users\M\Documents\ImageMaster\Projects\Tutorials\Tutorial\MatchSet\BTG12.gda	2421	0.739621
C:\Users\M\Documents\ImageMaster\Projects\Tutorials\Tutorial\MatchSet\BTG13.gda	2890	0.852249
C:\Users\M\Documents\ImageMaster\Projects\Tutorials\Tutorial\MatchSet\BTG14.gda	3241	0.121329
C:\Users\M\Documents\ImageMaster\Projects\Tutorials\Tutorial\MatchSet\BTG15.gda	2668	0.264029
C:\Users\M\Documents\ImageMaster\Projects\Tutorials\Tutorial\MatchSet\BTG16.gda	3508	1.00669
C:\Users\M\Documents\ImageMaster\Projects\Tutorials\Tutorial\MatchSet\BTG17.gda	3063	0.592114
C:\Users\M\Documents\ImageMaster\Projects\Tutorials\Tutorial\MatchSet\BTG18.gda	2736	0.571455
C:\Users\M\Documents\ImageMaster\Projects\Tutorials\Tutorial\MatchSet\BTG19.gda	2403	0.463537
C:\Users\M\Documents\ImageMaster\Projects\Tutorials\Tutorial\MatchSet\BTG20.gda	2994	0.740282
F.PDI	Match Count	PTCb*	BTG*	Anova*		*Value given by the ImageMaster 2D Platinum V 7.0 software
	2	0.216775	0.435749	0.009
FileName	SpotID	%Vol
C:\Users\M\Documents\ImageMaster\Projects\Tutorials\Tutorial\MatchSet\PTC1.gda	3739	0.258687
C:\Users\M\Documents\ImageMaster\Projects\Tutorials\Tutorial\MatchSet\PTC2.gda	3117	0.278997
C:\Users\M\Documents\ImageMaster\Projects\Tutorials\Tutorial\MatchSet\PTC3.gda	2805	0.254567
C:\Users\M\Documents\ImageMaster\Projects\Tutorials\Tutorial\MatchSet\PTC4.gda	2424	0.209034
C:\Users\M\Documents\ImageMaster\Projects\Tutorials\Tutorial\MatchSet\PTC5.gda	5978	0.0825896
C:\Users\M\Documents\ImageMaster\Projects\Tutorials\Tutorial\MatchSet\BTG1.gda	3326	0.599059
C:\Users\M\Documents\ImageMaster\Projects\Tutorials\Tutorial\MatchSet\BTG2.gda	3039	0.67467
C:\Users\M\Documents\ImageMaster\Projects\Tutorials\Tutorial\MatchSet\BTG3.gda	2816	0.663694
C:\Users\M\Documents\ImageMaster\Projects\Tutorials\Tutorial\MatchSet\BTG4.gda	2725	0.537614
C:\Users\M\Documents\ImageMaster\Projects\Tutorials\Tutorial\MatchSet\BTG5.gda	2894	0.424807
C:\Users\M\Documents\ImageMaster\Projects\Tutorials\Tutorial\MatchSet\BTG6.gda	2540	0.31164
C:\Users\M\Documents\ImageMaster\Projects\Tutorials\Tutorial\MatchSet\BTG7.gda	3375	0.236761
C:\Users\M\Documents\ImageMaster\Projects\Tutorials\Tutorial\MatchSet\BTG8.gda	2801	0.516361
C:\Users\M\Documents\ImageMaster\Projects\Tutorials\Tutorial\MatchSet\BTG9.gda	3628	0.164547
C:\Users\M\Documents\ImageMaster\Projects\Tutorials\Tutorial\MatchSet\BTG10.gda	2429	0.2942
C:\Users\M\Documents\ImageMaster\Projects\Tutorials\Tutorial\MatchSet\BTG11.gda	3722	0.360149
C:\Users\M\Documents\ImageMaster\Projects\Tutorials\Tutorial\MatchSet\BTG12.gda	2411	0.658914
C:\Users\M\Documents\ImageMaster\Projects\Tutorials\Tutorial\MatchSet\BTG13.gda	2879	0.410459
C:\Users\M\Documents\ImageMaster\Projects\Tutorials\Tutorial\MatchSet\BTG14.gda	3266	0.0723903
C:\Users\M\Documents\ImageMaster\Projects\Tutorials\Tutorial\MatchSet\BTG15.gda	2672	0.36793
C:\Users\M\Documents\ImageMaster\Projects\Tutorials\Tutorial\MatchSet\BTG16.gda	3517	0.47972
C:\Users\M\Documents\ImageMaster\Projects\Tutorials\Tutorial\MatchSet\BTG17.gda	3022	0.457274
C:\Users\M\Documents\ImageMaster\Projects\Tutorials\Tutorial\MatchSet\BTG18.gda	2762	0.438068
C:\Users\M\Documents\ImageMaster\Projects\Tutorials\Tutorial\MatchSet\BTG19.gda	2349	0.526892
C:\Users\M\Documents\ImageMaster\Projects\Tutorials\Tutorial\MatchSet\BTG20.gda	2961	0.519841
G.UBE2N	Match Count	PTCb*	BTG*	Anova*		*Value given by the ImageMaster 2D Platinum V 7.0 software
	2	0.141558	0.302193	0.003
FileName	SpotID	%Vol
C:\Users\M\Documents\ImageMaster\Projects\Tutorials\Tutorial\MatchSet\PTC1.gda	4585	0.134051
C:\Users\M\Documents\ImageMaster\Projects\Tutorials\Tutorial\MatchSet\PTC2.gda	3952	0.216324
C:\Users\M\Documents\ImageMaster\Projects\Tutorials\Tutorial\MatchSet\PTC3.gda	3675	0.154402
C:\Users\M\Documents\ImageMaster\Projects\Tutorials\Tutorial\MatchSet\PTC4.gda	3136	0.183553
C:\Users\M\Documents\ImageMaster\Projects\Tutorials\Tutorial\MatchSet\PTC5.gda	7646	0.0194578
C:\Users\M\Documents\ImageMaster\Projects\Tutorials\Tutorial\MatchSet\BTG1.gda	4088	0.290198
C:\Users\M\Documents\ImageMaster\Projects\Tutorials\Tutorial\MatchSet\BTG2.gda	3820	0.312806
C:\Users\M\Documents\ImageMaster\Projects\Tutorials\Tutorial\MatchSet\BTG3.gda	3499	0.294588
C:\Users\M\Documents\ImageMaster\Projects\Tutorials\Tutorial\MatchSet\BTG4.gda	3365	0.3646
C:\Users\M\Documents\ImageMaster\Projects\Tutorials\Tutorial\MatchSet\BTG5.gda	3623	0.276724
C:\Users\M\Documents\ImageMaster\Projects\Tutorials\Tutorial\MatchSet\BTG6.gda	3105	0.358342
C:\Users\M\Documents\ImageMaster\Projects\Tutorials\Tutorial\MatchSet\BTG7.gda	4173	0.224306
C:\Users\M\Documents\ImageMaster\Projects\Tutorials\Tutorial\MatchSet\BTG8.gda	3674	0.305113
C:\Users\M\Documents\ImageMaster\Projects\Tutorials\Tutorial\MatchSet\BTG9.gda	4535	0.456326
C:\Users\M\Documents\ImageMaster\Projects\Tutorials\Tutorial\MatchSet\BTG10.gda	3049	0.305419
C:\Users\M\Documents\ImageMaster\Projects\Tutorials\Tutorial\MatchSet\BTG11.gda	4424	0.183618
C:\Users\M\Documents\ImageMaster\Projects\Tutorials\Tutorial\MatchSet\BTG12.gda	3032	0.151538
C:\Users\M\Documents\ImageMaster\Projects\Tutorials\Tutorial\MatchSet\BTG13.gda	3570	0.362068
C:\Users\M\Documents\ImageMaster\Projects\Tutorials\Tutorial\MatchSet\BTG14.gda	4101	0.473103
C:\Users\M\Documents\ImageMaster\Projects\Tutorials\Tutorial\MatchSet\BTG15.gda	3302	0.291672
C:\Users\M\Documents\ImageMaster\Projects\Tutorials\Tutorial\MatchSet\BTG16.gda	4288	0.538109
C:\Users\M\Documents\ImageMaster\Projects\Tutorials\Tutorial\MatchSet\BTG17.gda	3828	0.247291
C:\Users\M\Documents\ImageMaster\Projects\Tutorials\Tutorial\MatchSet\BTG18.gda	3479	0.193469
C:\Users\M\Documents\ImageMaster\Projects\Tutorials\Tutorial\MatchSet\BTG19.gda	2967	0.223293
C:\Users\M\Documents\ImageMaster\Projects\Tutorials\Tutorial\MatchSet\BTG20.gda	3867	0.191275
