# Supplementary material for: Tissue and serum samples of patients with papillary thyroid cancer with and without benign background demonstrate different altered expression of proteins
Source: PeerJ. 2016 Sep 13;4:e2450. doi: 10.7717/peerj.2450 (PMC5028788; doi:10.7717/peerj.2450)
Supplement: Supplemental Information 3 — (A) Shows absorbance value and protein concentration of tissue A1AT; (B) Shows absorbance value and protein concentration of tissue HSP70; (C) Shows absorbance value and protein concentration of serum A1AT; (D) Shows absorbance value and protein concentration of serum AHSG. [file peerj-04-2450-s003.xlsx]

## Sheet: Sheet1
Title:
ELISA analyses of tissue (panels A and B) and serum (panels C and D) proteins in BTG, PTCa and PTCb patients.
Legend:
A) Shows absorbance value and protein concentration of tissue A1AT
B) Shows absorbance value and protein concentration of tissue HSP70
C) Shows absorbance value and protein concentration of serum A1AT
D) Shows absorbance value and protein concentration of serum AHSG
A.A1AT													B.HSP70
Absorbance				Protein Concentration (mg/ml)									Absorbance				Protein Concentration (µg/ml)
BTG	PTCa	PTCb		BTG	PTCa	PTCb							BTG	PTCa	PTCb		BTG	PTCa	PTCb
1.707	1.6335	1.676		0.364515	0.719041	0.514043							0.1035	0.1	0.158		0.114694	0.110815	0.175088
1.691	1.632	1.623		0.441691	0.726276	0.769687							0.094	0.12	0.155		0.104166	0.132978	0.171763
1.7345	1.61	1.6685		0.231869	0.832392	0.550219							0.165	0.165	0.1545		0.182845	0.182845	0.171209
1.738	1.633	1.6805		0.214987	0.721452	0.492337							0.1235	0.149	0.179		0.136857	0.165114	0.198359
1.622	1.6645	1.6975		0.774511	0.569513	0.410338							0.0955	0.1545	0.1495		0.105828	0.171209	0.165668
1.735	1.635	1.6765		0.229457	0.711806	0.511631							0.216	0.179	0.154		0.23936	0.198359	0.170655
1.675	1.6495			0.518867	0.641865								0.2095	0.1495			0.232158	0.165668
1.7135	1.645			0.333162	0.663571								0.1715	0.154			0.190048	0.170655
1.634				0.716629									0.1845				0.204454
1.6315				0.728688									0.1175				0.130208
1.634				0.716629									0.1545				0.171209
1.684				0.475455									0.1205				0.133532
1.7295				0.255986									0.2055				0.227725
1.6945				0.424809									0.175				0.193926
1.6265				0.752805									0.0815				0.0903142
1.6535				0.622571									0.085				0.0941928
1.662				0.581572									0.1965				0.217752
1.665				0.567101									0.121				0.134086
1.6865				0.463396									0.1165				0.129099
1.7345				0.231869									0.189				0.20944
C.A1AT													D.AHSG
Absorbance				Protein Concentration (mg/ml)									Absorbance				Protein Concentration (µg/ml)
BTG	PTCa	PTCb		BTG	PTCa	PTCb							BTG	PTCa	PTCb		BTG	PTCa	PTCb
1.54	1.483	1.724		9.36029	11.5598	2.26013							1.452	1.421	1.483		0.495758	0.485174	0.506343
1.572	1.528	1.6935		8.12548	9.82334	3.43705							1.655	1.59	1.651		0.565069	0.542876	0.563703
1.664	1.624	1.636		4.5754	6.11891	5.65586							1.672	1.6	1.782		0.570873	0.54629	0.608431
1.635	1.4315	1.547		5.69444	13.5278	9.09018							1.443	1.572	1.71		0.492685	0.53673	0.583847
1.6345	1.506	1.731		5.69444	10.6723	1.99001							1.455	1.649	1.658		0.496783	0.56302	0.566093
1.6415	1.6215	1.572		5.42433	6.21538	8.12548							1.608	1.75	1.762		0.549022	0.597505
1.7	1.6755			3.18623	4.13164								1.455	1.623			0.496783	0.554143
1.632	1.488			5.81021	11.3669								1.588	1.605			0.542193	0.547997
1.648				5.1928									1.66				0.566776
1.522				10.0549									1.555				0.530926
1.597				7.16078									1.475				0.503611
1.704				3.03188									1.519				0.518634
1.636				5.65586									1.453				0.4961
1.649				5.15421									1.551				0.52956
1.684				3.80364									1.548				0.528536
1.739				1.68131									1.461				0.498831
1.665				4.53681									1.602				0.546973
1.6315				5.8295									1.565				0.53434
1.716				3.68788									1.468				0.501221
1.6735				4.20881									1.621				0.55346
